# Supplementary material for: Effectiveness of Immune Checkpoint Inhibition vs Chemotherapy in Combination With Radiation Therapy Among Patients With Non–Small Cell Lung Cancer and Brain Metastasis Undergoing Neurosurgical Resection
Source: PubMed Central journal article supplement (PMC9055459; doi:10.1001/jamanetworkopen.2022.9553), 2022-04-29
Supplement: jamanetwopen-e229553-s001.pdf [file jamanetwopen-e229553-s001.pdf]

## Supplemental Online Content

Wasilewski D, Radke J, Xu R, et al. Effectiveness of immune checkpoint inhibition vs chemotherapy in combination with radiation therapy among patients with non–small cell lung cancer and brain metastasis undergoing neurosurgical resection. *JAMA Netw Open*. 2022;5(4):e229553. doi:10.1001/jamanetworkopen.2022.9553

**eTable 1.** Demographic, clinical and radiologic characteristics at baseline

**eFigure 1.** Kaplan Meier survival estimates of the whole patient cohort

**eFigure 2.** Correlation matrices of radiological and biomarker-related characteristics on survival

**eTable 2.** Univariable and multivariable Cox proportional regression in the whole patient cohort

**eFigure 3.** Testing for the proportional hazards (PH) assumption with Schoenfeld residuals

**eFigure 4.** Stratified Kaplan-Meier curves in matched patients for overall survival

**eFigure 5.** Distribution of propensity scores and standardized mean differences

**eTable 3.** Univariable and multivariable Cox proportional regression in the matched cohort

This supplemental material has been provided by the authors to give readers additional information about their work.

**eTable 1.** Demographic, clinical and radiologic characteristics at baseline

| <b>Table 1: Patient characteristics</b> |                |
|-----------------------------------------|----------------|
| <b>Characteristic</b>                   | <b>N = 384</b> |
| <b>Gender, n (%)</b>                    |                |
| M                                       | 215 (56)       |
| W                                       | 169 (44)       |
| <b>Age, Median (IQR)</b>                | 64 (57 – 72)   |
| <b>anatomical localization, n (%)</b>   |                |
| frontal                                 | 121 (32)       |
| parietal                                | 75 (20)        |
| temporal                                | 40 (10)        |
| occipital                               | 42 (11)        |
| cerebellar                              | 99 (26)        |
| other                                   | 6 (1.6)        |
| Unknown                                 | 1              |
| <b>hydrocephalus at baseline, n (%)</b> | 47 (12)        |
| Unknown                                 | 8              |
| <b>hemorrhage at baseline, n (%)</b>    | 71 (19)        |
| Unknown                                 | 8              |
| <b>LMM at baseline, n (%)</b>           | 8 (2.1)        |
| Unknown                                 | 8              |

| <b>Table 1: Patient characteristics</b>                                  |                |
|--------------------------------------------------------------------------|----------------|
| <b>Characteristic</b>                                                    | <b>N = 384</b> |
| <b>no_of_BrM_Rxs, n (%)</b>                                              |                |
| 1                                                                        | 344 (90)       |
| 2                                                                        | 34 (8.9)       |
| 3                                                                        | 3 (0.8)        |
| 4                                                                        | 3 (0.8)        |
| <b>Number of brain metastases at baseline, n (%)</b>                     |                |
| one                                                                      | 144 (38)       |
| two                                                                      | 127 (33)       |
| more than two                                                            | 113 (29)       |
| <b>Brain region affected of brain metastasis, n (%)</b>                  |                |
| supratentorial                                                           | 234 (61)       |
| infratentorial                                                           | 60 (16)        |
| both                                                                     | 90 (23)        |
| <b>volume of dominant (resected) brain metastasis (mL), Median (IQR)</b> | 8 (4 – 16)     |
| Unknown                                                                  | 12             |
| <b>Extracranial metastasis at baseline, n (%)</b>                        |                |
| UICC stage IV                                                            | 318 (86)       |
| UICC stage I-III                                                         | 52 (14)        |
| Unknown                                                                  | 14             |
| <b>UICC stage, n (%)</b>                                                 | 52 (14)        |

| <b>Table 1: Patient characteristics</b> |                |
|-----------------------------------------|----------------|
| <b>Characteristic</b>                   | <b>N = 384</b> |
| Unknown                                 | 14             |
| <b>KPS after operation, n (%)</b>       |                |
| < 70%                                   | 160 (42)       |
| >/= 70%                                 | 224 (58)       |
| <b>GPA after operation , n (%)</b>      |                |
| >/=2                                    | 231 (60)       |
| <2                                      | 151 (40)       |
| Unknown                                 | 2              |

**eTable 1A: Demographic, clinical and radiologic characteristics at baseline**

Baseline characteristics were selected based on previous reports and literature within the field<sup>1-4</sup>. The *gtsummary* package and windows word were used to describe tabular data of our patient cohort, including continuous, categorical or numerical as well as dichotomized variables.

| <b>Table 2: Treatment-related patient characteristics</b> |                |
|-----------------------------------------------------------|----------------|
| <b>Characteristic</b>                                     | <b>N = 384</b> |
| <b>Number of brain metastasis resections, n (%)</b>       |                |
| 1                                                         | 344 (90)       |
| 2                                                         | 34 (8.9)       |
| 3                                                         | 3 (0.8)        |
| 4                                                         | 3 (0.8)        |

|                                                                                |                |
|--------------------------------------------------------------------------------|----------------|
| <b>resection of independent lesions, n (%)</b>                                 | 12 (30)        |
| <b>resection due to local recurrence, n (%)</b>                                | 28 (70)        |
| <b>time to local re-resection, Median (IQR)</b>                                | 234 (72 – 503) |
| <b>primary tumor resection in context of brain metastasis resection, n (%)</b> |                |
| no primary tumor resection                                                     | 262 (68)       |
| primary tumor resection before brain metastasis resection                      | 87 (23)        |
| primary tumor resection after brain metastasis resection                       | 35 (9.1)       |
| <b>primary tumor resection, n (%)</b>                                          |                |
| no primary tumor resection                                                     | 262 (68)       |
| primary tumor resection                                                        | 122 (32)       |
| <b>pre-treatment at baseline, n (%)</b>                                        |                |
| no neoadjuvant treatment                                                       | 270 (70)       |
| RTx + CTx                                                                      | 94 (24)        |
| RTx + ICI                                                                      | 12 (3.1)       |
| RTx + SMI                                                                      | 8 (2.1)        |
| <b>mode of cranial radiation after first brain metastasis resection, n (%)</b> |                |
| WBRT                                                                           | 120 (36)       |
| local irradiation of resection cavity                                          | 88 (26)        |
| SRS                                                                            | 0 (0)          |
| not known                                                                      | 129 (38)       |

|                                                                                       |              |
|---------------------------------------------------------------------------------------|--------------|
| <b>fraction of stereotactically irradiated patients, n (%)</b>                        |              |
| other than SRS                                                                        | 340 (89)     |
| SRS                                                                                   | 44 (11)      |
| <b>dose of cranial radiation after first brain metastasis resection, Median (IQR)</b> | 31 (30 – 42) |
| <b>adjuvant treatment groups of interest: RTx + CTx vs. RTx + ICI, n (%)</b>          |              |
| RTx + CTx                                                                             | 108 (63)     |
| RTx + ICI                                                                             | 63 (37)      |
| <b>main adjuvant treatment groups, n (%)</b>                                          |              |
| RTx + CTx                                                                             | 108 (57)     |
| RTx + ICI                                                                             | 63 (33)      |
| RTx + SMIs                                                                            | 19 (10)      |
| <b>adjuvant treatment modalities, n (%)</b>                                           |              |
| best supportive care (bsc)                                                            | 43 (11)      |
| chemotherapy (CTx)                                                                    | 6 (1.6)      |
| not known                                                                             | 34 (8.9)     |
| radiation (RTx)                                                                       | 103 (27)     |
| radiation and chemotherapy(RTx + CTx)                                                 | 108 (28)     |
| radiation and immune therapy (RTx + ICI)                                              | 63 (16)      |
| radiation and targeted therapy (RTx + SMI)                                            | 27 (7.0)     |

**eTable 1B:** Treatment-related patient characteristics at baseline.

| <b>Table 3: Histopathological and biomarker-related patient characteristics</b> |                |
|---------------------------------------------------------------------------------|----------------|
| <b>Characteristic</b>                                                           | <b>N = 384</b> |
| <b>neutrophil-to-lymphocyte ratio, n (%)</b>                                    |                |
| < 5                                                                             | 105 (35)       |
| >= 5                                                                            | 195 (65)       |
| Unknown                                                                         | 84             |
| <b>tumor subtype, n (%)</b>                                                     |                |
| NSCLC                                                                           | 384 (100)      |
| <b>histologic subtype, n (%)</b>                                                |                |
| adenocarcinoma                                                                  | 329 (86)       |
| adenosquamous                                                                   | 4 (1.0)        |
| neuroendocrine differentiation                                                  | 13 (3.4)       |
| pulmonary sarcomatoid carcinoma                                                 | 2 (0.5)        |
| squamous cell cancer                                                            | 36 (9.4)       |
| <b>PDL1 status brain metastasis tissue, n (%)</b>                               |                |
| < 1                                                                             | 90 (56)        |
| >= 1                                                                            | 72 (44)        |
| Unknown                                                                         | 222            |
| <b>Ki67 brain metastasis tissue, n (%)</b>                                      |                |
| < 30                                                                            | 123 (38)       |
| >= 30                                                                           | 205 (62)       |
| Unknown                                                                         | 56             |
| <b>PDL1 extracranial tissue, n (%)</b>                                          |                |

|                                                      |          |
|------------------------------------------------------|----------|
| < 1                                                  | 30 (32)  |
| >= 1                                                 | 63 (68)  |
| Unknown                                              | 291      |
| <b>Ki67 extracranial tissue, n (%)</b>               |          |
| < 30                                                 | 36 (40)  |
| >= 30                                                | 53 (60)  |
| Unknown                                              | 295      |
| <b>EGFR status of brain metastasis tissue, n (%)</b> |          |
| wildtype                                             | 231 (94) |
| mutated                                              | 15 (6.1) |
| Unknown                                              | 138      |
| <b>ALK status of brain metastasis tissue, n (%)</b>  |          |
| wildtype                                             | 213 (97) |
| mutated                                              | 7 (3.2)  |
| Unknown                                              | 164      |
| <b>TTF1 status of brain metastasis tissue, n (%)</b> |          |
| negative                                             | 126 (33) |
| positive                                             | 251 (67) |
| Unknown                                              | 7        |

**eTable 1C:** Histopathological and biomarker-related characteristics of brain metastasis tissue at baseline. \*Information on molecular characteristics (i.e. driver mutations) of primary tumor tissue was not included into tabular data - only results from brain metastasis tissue were listed.



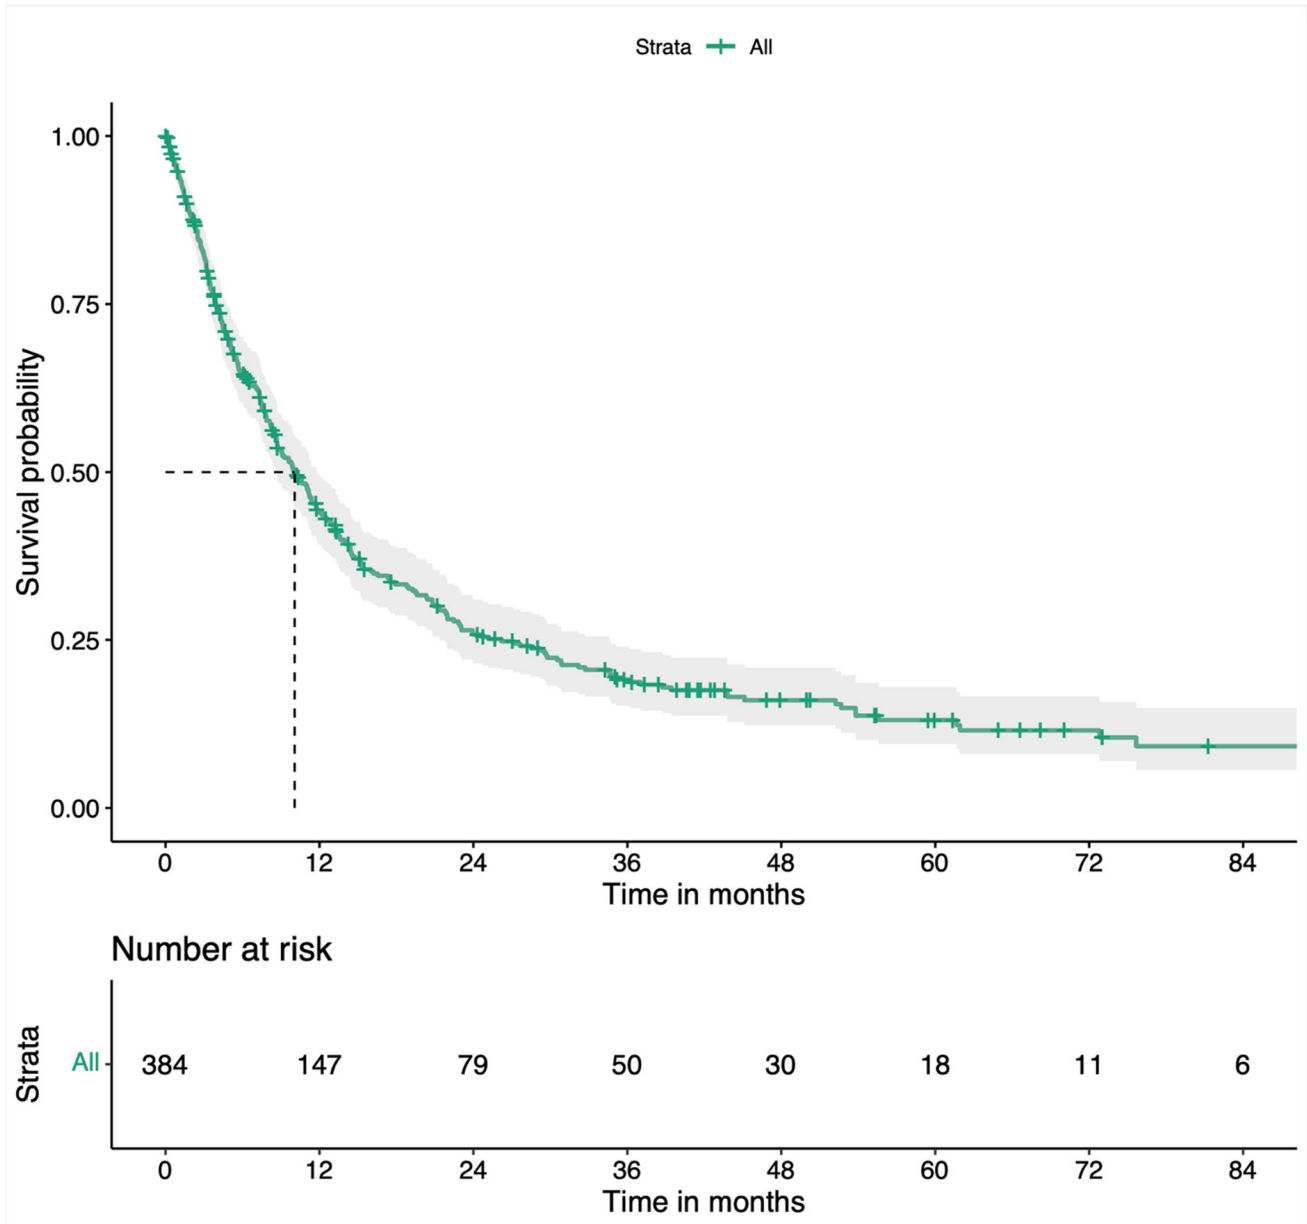

**eFigure 1: Kaplan Meier survival estimates of the whole patient cohort**

Kaplan Meier survival analysis for OS in the entire patient cohort of NSCLC patients subjected to craniotomy and brain metastasis removal (N=384).

**A**

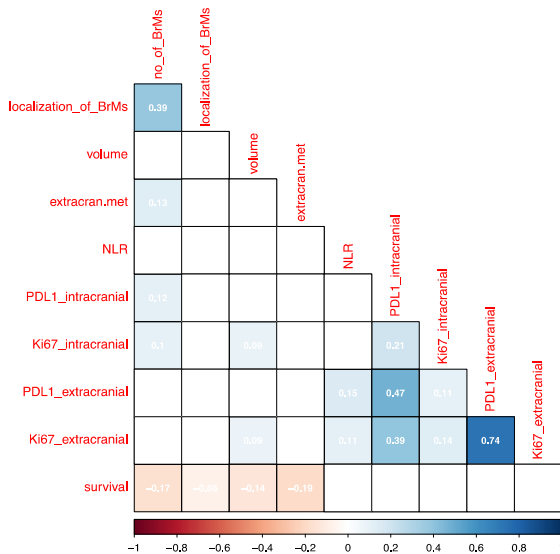

**B**

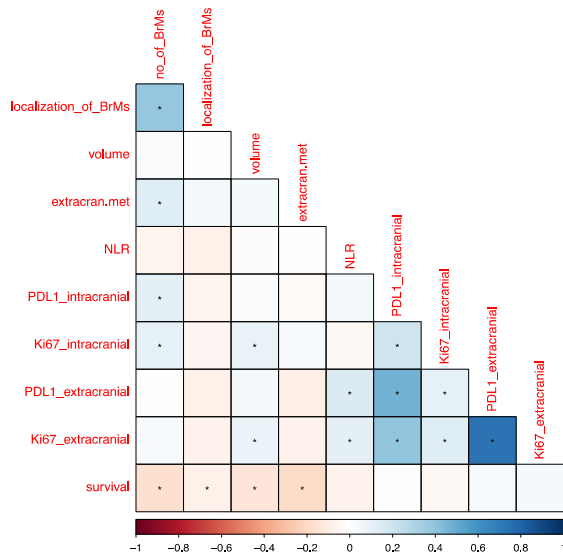

**eFigure 2: Correlation matrices of radiological and biomarker-related characteristics on survival**

Correlation plots using non-parametric Spearman’s correlation test to measure the degree of association between different clinically linked covariates, with correlation coefficients depicted in case a significant correlation was present (A). The right correlation plot shows the respective significance levels (B).

**eTable 2: Univariable and multivariable Cox proportional regression in the whole patient cohort**

| Dependent:<br>Surv(survival,<br>censoring) |                  | all           | HR (CPH<br>univar.<br>analysis) | HR (CPH<br>multivar.analysis) |
|--------------------------------------------|------------------|---------------|---------------------------------|-------------------------------|
| localization_of_BrMs                       | supratentorial   | 234<br>(60.9) | -                               | -                             |
|                                            | infratentorial   | 60<br>(15.6)  | 1.10 (0.80-<br>1.51, p=0.550)   |                               |
|                                            | both             | 90<br>(23.4)  | 1.48 (1.12-<br>1.95, p=0.005)   | 1.62 (0.95-2.77,<br>p=0.077)  |
| GPA2 (lung mol<br>GPA score)               | GPA below 2,5    | 246<br>(64.4) | -                               | -                             |
|                                            | GPA at least 2,5 | 136<br>(35.6) | 0.45 (0.35-<br>0.57, p<0.001)   | 0.98 (0.60-1.58,<br>p=0.924)  |

|                                                |                            |               |                           |                                     |
|------------------------------------------------|----------------------------|---------------|---------------------------|-------------------------------------|
| no_of_BrMs<br>(number of brain metastases)     | one                        | 144<br>(37.5) | -                         | -                                   |
|                                                | two                        | 127<br>(33.1) | 1.39 (1.05-1.84, p=0.021) | 0.89 (0.56-1.41, p=0.610)           |
|                                                | more than two              | 113<br>(29.4) | 1.96 (1.47-2.60, p<0.001) | 1.16 (0.66-2.06, p=0.604)           |
| extracran.met<br>(extracranial metastasis)     | No                         | 257<br>(66.9) | -                         | -                                   |
|                                                | Yes                        | 127<br>(33.1) | 1.81 (1.42-2.31, p<0.001) | <b>2.17 (1.34-3.51, p=0.002)</b>    |
| primary_tumor.Rx2<br>(primary tumor resection) | no primary tumor resection | 262<br>(68.2) | -                         | -                                   |
|                                                | primary tumor resection    | 122<br>(31.8) | 0.47 (0.36-0.61, p<0.001) | <b>0.51 (0.32-0.82, p=0.006)</b>    |
| adj.RTx3 (modality of adjuvant RTx)            | other than SRS             | 340<br>(88.5) | -                         | -                                   |
|                                                | SRS                        | 44<br>(11.5)  | 0.56 (0.39-0.82, p=0.002) |                                     |
| adj.tx2 (adjuvant therapy after neurosurgery)  | RTx + CTx                  | 108<br>(63.2) | -                         | -                                   |
|                                                | RTx + ICI                  | 63<br>(36.8)  | 0.45 (0.30-0.68, p<0.001) | <b>0.32 (0.20-0.51, p&lt;0.001)</b> |

Cox regression analysis of potential prognostic covariates and overall survival for the whole patient cohort (N=384).

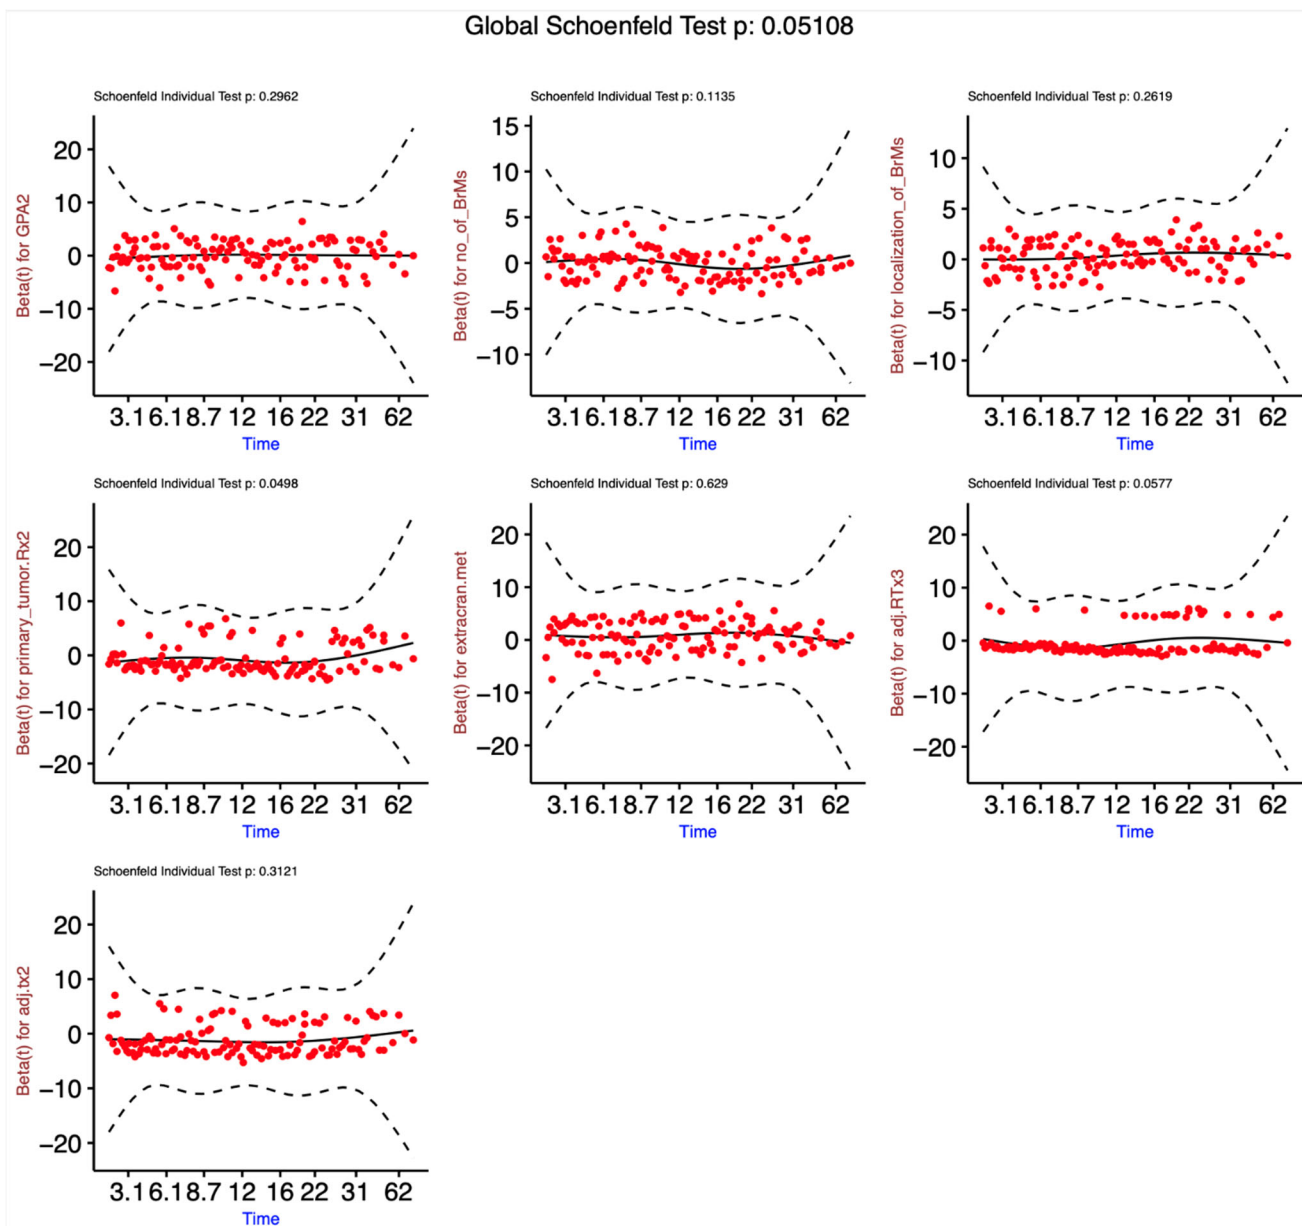

**eFigure 3: Testing for the proportional hazards (PH) assumption with Schoenfeld residuals**

Statistical testing including graphical diagnostics based on scaled Schoenfeld residuals for each covariate of interest (prognostic covariates): GPA score, number of brain metastases, localization of brain metastases, primary tumor resection, extracranial metastases, modality of adjuvant radiation therapy, adjuvant therapy; only adj.TTx3 (juvant radiation therapy) reached a nearly significance, hence global Schoenfeld test was not significant, therefore proportional hazards assumption was assumed.

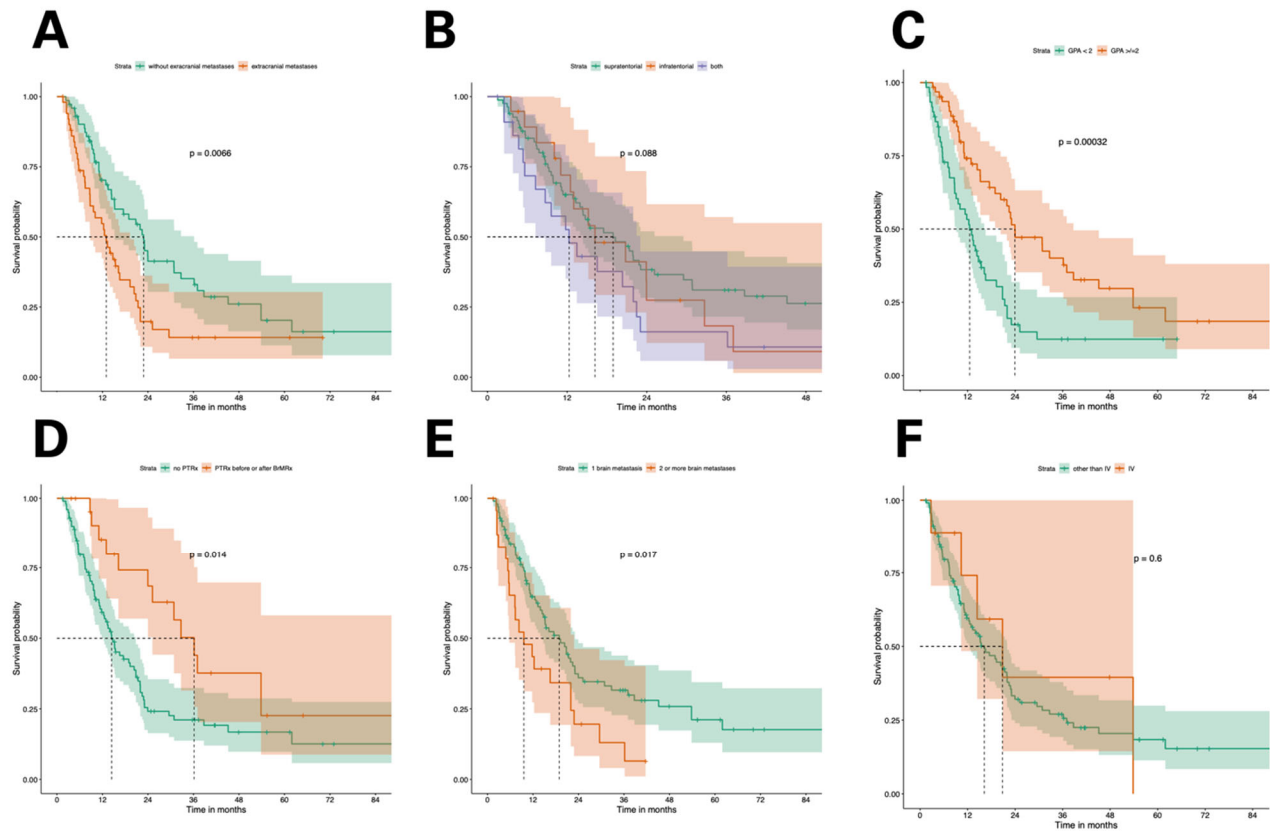

**eFigure 4: Stratified Kaplan-Meier curves in matched patients for overall survival**

Kaplan Meier analysis stratified according to the following characteristics: **A**) presence of extracranial metastases; **B**) localization of brain metastatic lesions at baseline (i.e. before first brain metastasis resection); **C**) graded prognostics assessment (GPA) score; **D**) status of primary tumor resection; **E**) number of brain metastasis resections; **F**) UICC stage.

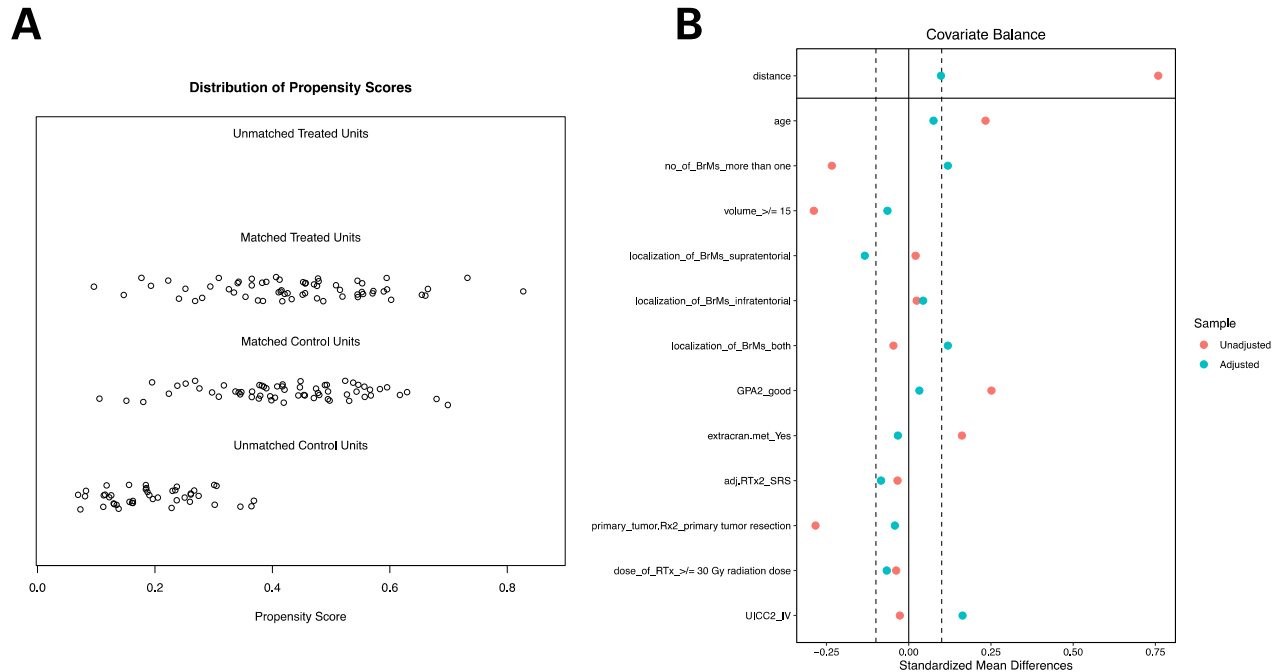

**eFigure 5: Distribution of propensity scores and standardized mean differences**

Distribution map after propensity score matching (PSM) (**A**). Plot displaying the standardized mean difference (SMD) of each covariate considered for PSM between treatment groups standardized (**B**). R code can be accessed upon request via Github: [https://github.com/dasilew/clinicalNSCLC\\_1](https://github.com/dasilew/clinicalNSCLC_1).

**eTable 3: Univariable and multivariable Cox proportional regression in the matched cohort**

| explanatory                |                                        | HR (CPH univar. analysis) | HR (CPH multivar. analysis)      |
|----------------------------|----------------------------------------|---------------------------|----------------------------------|
| gender                     | Male<br>Female                         | 1.00 (0.65-1.54, p=0.996) |                                  |
| age                        |                                        | 1.02 (1.00-1.05, p=0.077) |                                  |
| GPA2 (GPA score)           | Bad GPA (2 or less)<br>Good GPA (>= 2) | 0.48 (0.31-0.74, p=0.001) | <b>0.46 (0.22-0.99, p=0.047)</b> |
| extracranial metastases    | No<br>Yes                              | 1.88 (1.22-2.91, p=0.004) | 1.02 (0.49-2.12, p=0.961)        |
| volume                     | < 15<br>>= 15                          | 0.98 (0.64-1.51, p=0.932) |                                  |
| Number of brain metastases | One<br>>= 1                            | 1.84 (1.11-3.06, p=0.019) | 1.30 (0.64-2.65, p=0.471)        |

|                                         |                              |                           |                                     |
|-----------------------------------------|------------------------------|---------------------------|-------------------------------------|
| Localization of brain metastasis        | infratentorial               | 1.35 (0.75-2.44, p=0.322) |                                     |
| Localization of brain metastasis        | Both (supra-/infratentorial) | 1.71 (1.00-2.93, p=0.052) |                                     |
| UICC stage                              | Stage IV                     | 0.79 (0.32-1.95, p=0.610) |                                     |
| Primary tumor resection                 | No                           | 0.40 (0.20-0.78, p=0.007) | <b>0.26 (0.12-0.53, p&lt;0.001)</b> |
| Adjuvant RTx (SRS vs. other modalities) | Yes                          | 0.64 (0.36-1.11, p=0.113) |                                     |
| Adjuvant RTx + ICIs vs. RTx + CTx       | SRS                          | 0.44 (0.28-0.69, p<0.001) | <b>0.27 (0.16-0.45, p&lt;0.001)</b> |

Univariable and multivariable Cox proportional regression analysis for matched data (N=124).
